# Supplementary material for: Assessment of Socio-Economic and Climate Change Impacts on Water Resources in Four European Lagoon Catchments
Source: Springer Nature journal article supplement (doi:10.1007/s00267-019-01188-1), 2019-11-08

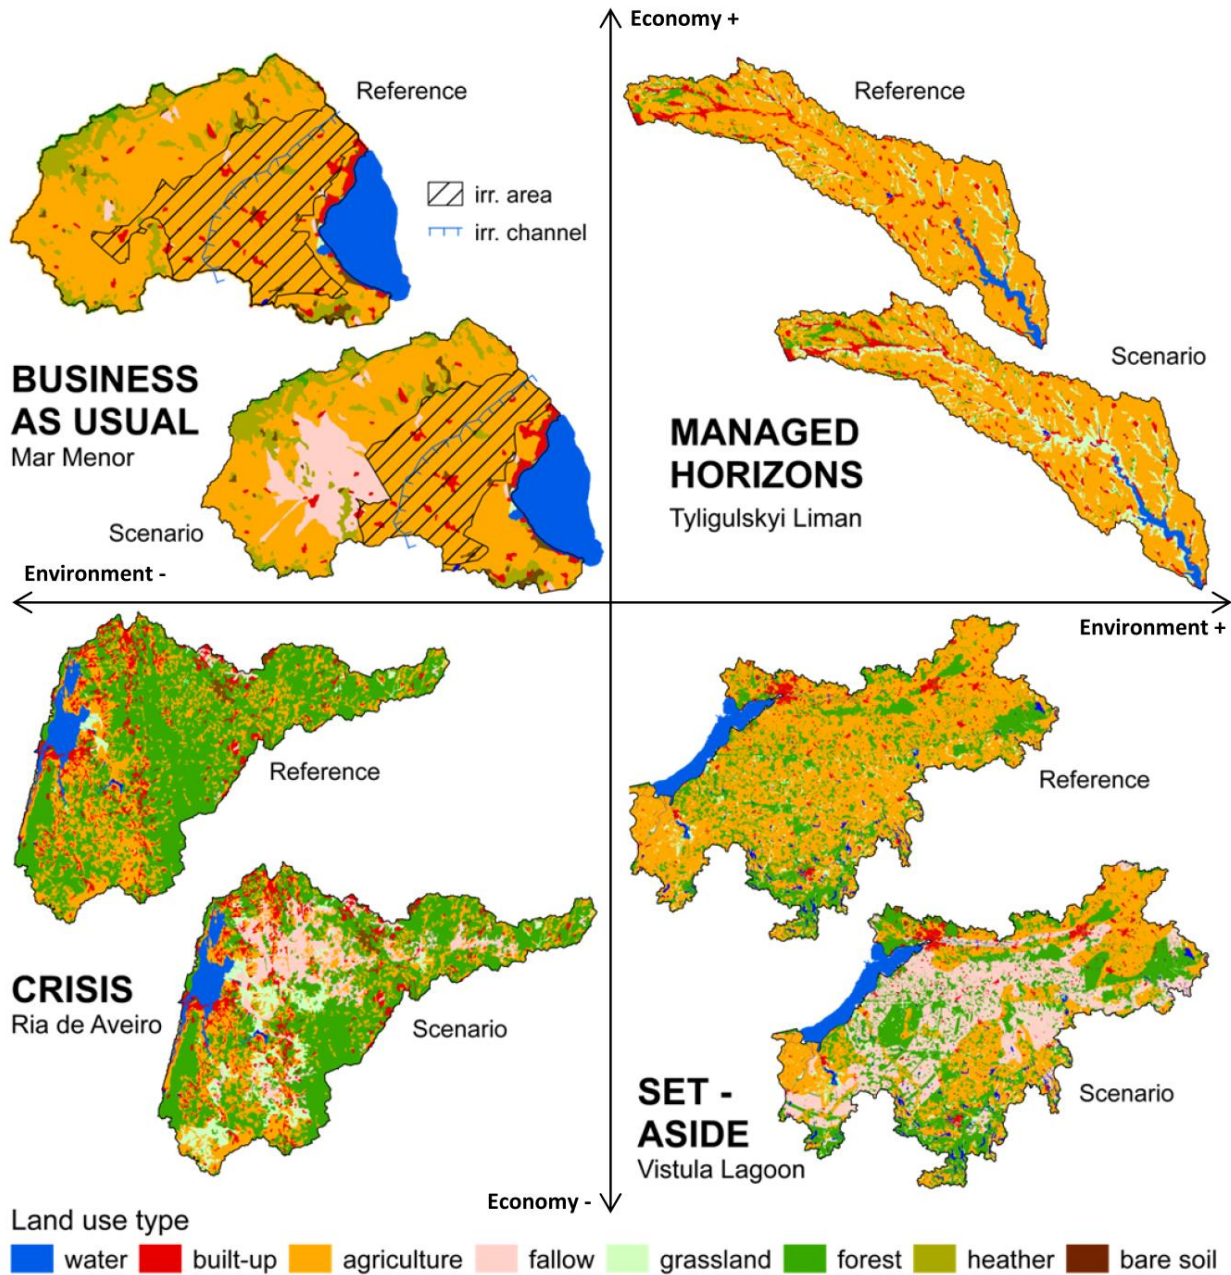

Supplement: MOESM1 [file 17369012]
